# Supplementary material for: A versatile synthesis of new pyrimidinyl nitronyl nitroxides
Source: Royal Society of Chemistry journal article supplement (doi:10.1039/b309786b), 2003-01-01
Supplement: b309786b.doc [file b309786b.doc]

**Experimental**

*4-amino-2,4-dimethyl-2-pentanol*, **6**: Diacetonamine **5** (10.4 g, 0.09 mol, freshly regenerated from 20 g of diacetoneamine hydrogen oxalate and 200 mL of 5N NaOH) in diethyl ether (100 mL) was added dropwise to methylmagnesium iodide (0.4 mol) in dry diethyl ether (300 mL). When the addition was complete, the mixture was refluxed for 90 min, cooled in a ice bath, and water (30 mL) was then carefully added. The diethyl ether layer was discarded and the precipitate extracted with CH2Cl2 during 28 hours in a Soxhlet apparatus. Concentration of the solvent afforded 18.6 g (78 %, m.p. 139-140°C) of white crystals of the hydroiodide. Elemental analysis (%) calcd for C7H18NOI: C32.45, H7.00, N5.41; found: C32.58, H7.12, N5.58. 1H NMR (200 MHz, 20°C, CDCl3): **1.44 (s, 6H, CH3), 1.63 (s, 6H, CH3), 1.99 (s, 2H, CH2), 3.43 (bs, 3H, NH, OH); 13C NMR (200 MHz, 20°C, CDCl3): **32.45 (CH3), 33.18 (CH3), 51.55 (CH2), 70.15 (C).

To a solution of the hydroiodide (10 g, 38.5 mmol) in water (100 mL), cooled in an ice bath NaOH pellets (40 g) were carefully added. Extraction with Et2O gave after conventional work up **6** as a colourless liquid (5.0 g, 98 %, m.p.°C,). 1H NMR (200 MHz, 20°C, CDCl3): **1.23 (s, 6H, CH3), 1.24 (s, 6H, CH3), 1.55 (s, 2H, CH2), 3.12 (3H, NH2, OH).

*2-benzamido-4-amino-2,4-dimethylpentane* **7a**: **6** (4.0 g, 30 mmol) was slowly added to a pre-chilled mixture of sulfuric acid (96%, 10 mL) and cold benzonitrile (10 mL). Stirring was continued at room temperature for 2 days. H2O (70 mL) was added drop wise with cooling and the solution then extracted with CH2Cl2 (4x50 mL) to remove benzamide (4.2 g) and unreacted benzonitrile. NaOH, 10 M (70 mL) was carefully added with cooling to this solution. After extraction with Et2O (4x50 mL), drying and solvent removal, a crude mixture (6.3 g) containing **7a** and 10-20 % of benzamide was obtained. It was dissolved in HCl (2 M, 100 mL) and the solution was refluxed for 2 hours. After extraction of the acid solution (affording benzoic acid, 1.3 g, m.p. 122 °C); the aqueous phase was made strongly basic (NaOH 10 M, 50 mL) and then extracted with Et2O (5x50 mL) to give **7a** (5.3 g, 22.6 mmol, 75%) as a white solid (mp. 104-106 °C). Elemental analysis (%) calcd for C14H22N2O: C71.79, H9.40, N11.96; found C72.01, H9.53, N11.84. 1H NMR (200 MHz, 20°C, CDCl3): **1.33 (s, 6 H, CH3), 1.57 (s, 6H, CH3), 1.83 (s, 2H, CH2), 7.31-7.43 (m, 3H, aromatic), 7.84-7.89 (m, 2H, aromatic).

*2-phenyl-4,4,6,6-tetramethyl-1,4,5,6-tetrahydropyrimidine*, **8a**: **7a** (2 g, 8.5 mmol) was refluxed for 36 hours in a solution of Ba(OH)2 (5 g) in H2O (30 mL). The resulting mixture was then filtered and the filtrate extracted with CH2Cl2 (3x100 mL) to afford **8a** (1.57 g, 7.3 mmol, 86%, m.p. 94-96 °C) as a white solid. Elemental analysis (%) calcd for C14H20N2: C77.77, H9.25, N12.96; found C77.61, H9.32, N12.78. 1H NMR (200 MHz, 20°C, CDCl3), **1.31 (s, 12 H, CH3), 1.68 (s, 2H, CH2), 7.32-7.35 (m, 3H, aromatic), 7.60-7.65 (m, 2H, aromatic).

*2-phenyl-4,4,6,6-tetramethyl-1,4,5,6-tetrahydropyrimidine-3-oxide-1-oxyl,* **10a**: To **8a** (100 mg, 0.43 mmol) dissolved in dry THF (50 mL) was added *m*CPBA (510mg, 3 mmol) and the solution gently stirred for 2 days at 4-6 °C. The dark green solution was further oxidized with NaIO4 (210 mg, 1 mmol) and stirred until it became dark blue. Filtration on an alumina bed followed by chromatography on silica gel (Et2O) afforded **10a** as a dark blue stable solid (42 mg, 0.17 mmol, 40 %, m.p. 139-140 ° C). Single crystals were grown by slow evaporation of a hexane-Et2O solution. Elemental analysis (%) calcd for C14H19N2O2: C67.99, H7.74, N11.33; found C67.80, H7.84, N11.19.
